# Supplementary material for: Skin microbiota analysis in patients with anorexia nervosa and healthy-weight controls reveals microbial indicators of healthy weight and associations with the antimicrobial peptide psoriasin
Source: PubMed Central journal article supplement (PMC9477808; doi:10.1038/s41598-022-19676-6), 2022-09-15
Supplement: 41598_2022_19676_MOESM1_ESM.pdf [file 41598_2022_19676_MOESM1_ESM.pdf]

# Skin microbiota analysis in patients with anorexia nervosa and healthy-weight controls reveals microbial indicators of healthy weight and associations with the antimicrobial peptide psoriasin

Hermes, Britt M.<sup>1,2,3\*</sup>, Rademacher, Franziska<sup>4</sup>, Chung, Cecilia<sup>1</sup>, Tiegs, Gisa<sup>5</sup>, Bendix, Marie-Christin<sup>6</sup>, de Zwaan, Martina<sup>6</sup>, Harder, Jürgen<sup>4\*+</sup>, Baines, John F.<sup>1,2\*+</sup>

## Author affiliations

<sup>1</sup> Max Planck Institute for Evolutionary Biology, Plön, Germany

<sup>2</sup> Section of Evolutionary Medicine, Institute for Experimental Medicine, Kiel University, Kiel, Germany

<sup>3</sup> Lübeck Institute of Experimental Dermatology, University of Lübeck, Lübeck, Germany

<sup>4</sup> Department of Dermatology, University Hospital Schleswig-Holstein, Kiel, Germany

<sup>5</sup> Institute of Experimental Immunology and Hepatology, University Medical Center Hamburg-Eppendorf, Hamburg, Germany.

<sup>6</sup> Department of Psychosomatic Medicine and Psychotherapy, Hannover Medical School, Germany

<sup>+</sup> These authors jointly supervised this work: Harder, Jürgen and Baines, John F.

<sup>\*</sup> Corresponding authors: [hermes@evolbio.mpg.de](mailto:hermes@evolbio.mpg.de); [baines@evolbio.mpg.de](mailto:baines@evolbio.mpg.de); [jharder@dermatology.uni-kiel.de](mailto:jharder@dermatology.uni-kiel.de)

**Abbreviations:** anorexia nervosa (AN), antimicrobial peptide (AMP), body mass index (BMI), amplicon-sequence variants (ASV)

## Supplementary Figures

- **Supplementary Figure S1.** Beta diversity
- **Supplementary Figure S2.** Constrained analysis of principal coordinates of the Bray–Curtis dissimilarity index
- **Supplementary Figure S3.** Spearman correlations between indicator *Abiotrophia* and psoriasin concentrations
- **Supplementary Figure S4.** Box plots of relative abundances of *Staphylococcus*, *Propionibacterium*, and the sum relative abundance for *Staphylococcus*, *Propionibacterium*, and *Lactobacillus*

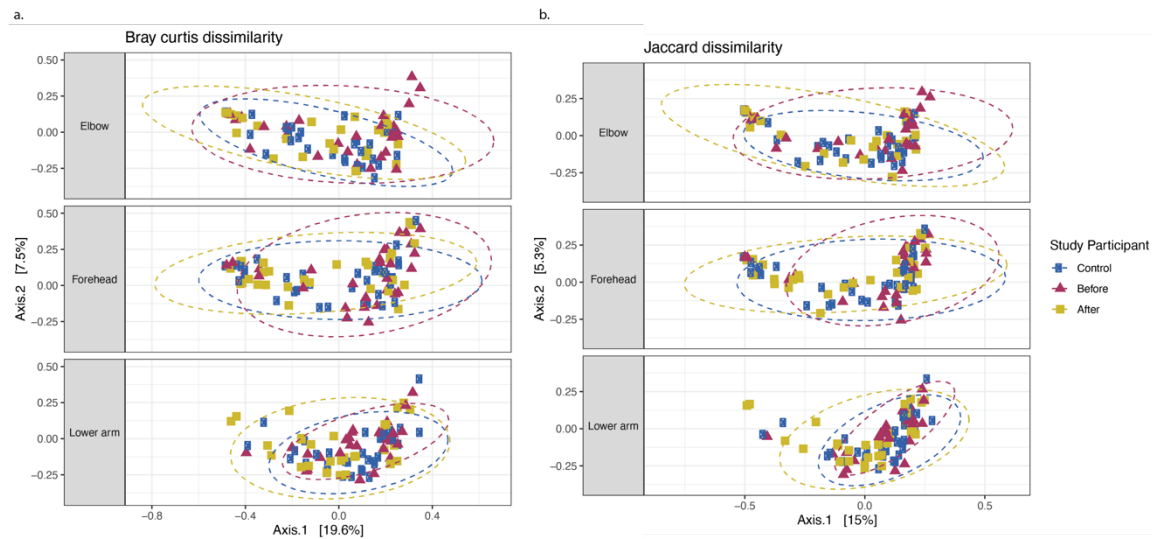

**Supplementary Figure 1.** Beta diversity based on a. Bray-Curtis dissimilarity index by sampling location and b. Jaccard index by sampling location. Blue represents healthy-weight controls, red represents patients with AN before weight gain, and gold represents patients with AN after weight gain. AN = anorexia nervosa

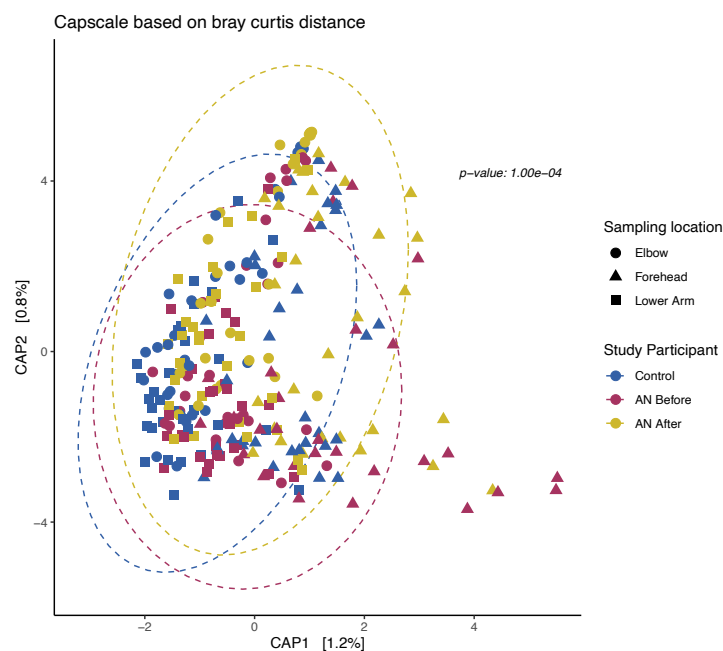

**Supplementary Figure 2.** Constrained analysis of principal coordinates of the Bray-Curtis dissimilarity index with respect to treatment status. Blue represents healthy-weight controls, red represents patients with AN before weight gain, and gold represents patients with AN after weight gain. AN = anorexia nervosa

## Skin microbiota in anorexia nervosa

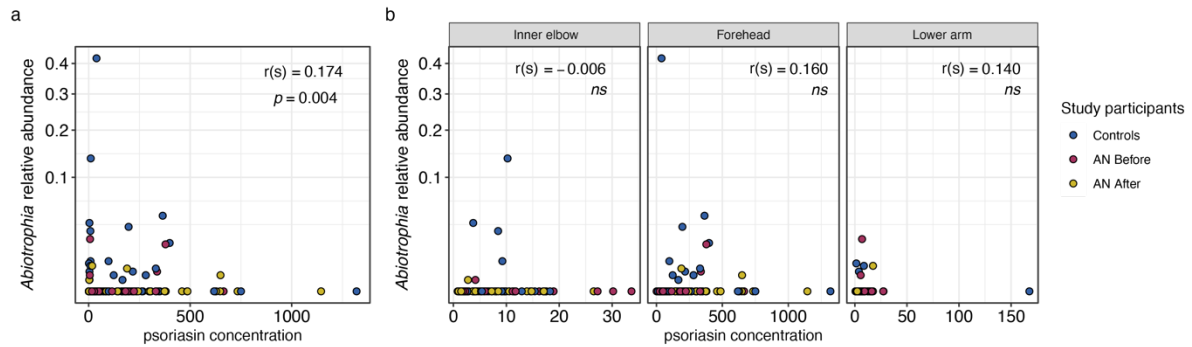

**Supplementary Fig S3.** Spearman correlations between indicator *Abiotrophia* and psoriasis concentrations a. at all locations and b. faceted by sampling location.  $r(s)$  = spearman's Rho. AN = anorexia nervosa. ns = not significant. Blue represents healthy-weight controls, red represents patients with AN before weight gain, and gold represents patients with AN after weight gain.  $p$ -values were adjusted for multiple testing according to Benjamini and Hochberg (1995).

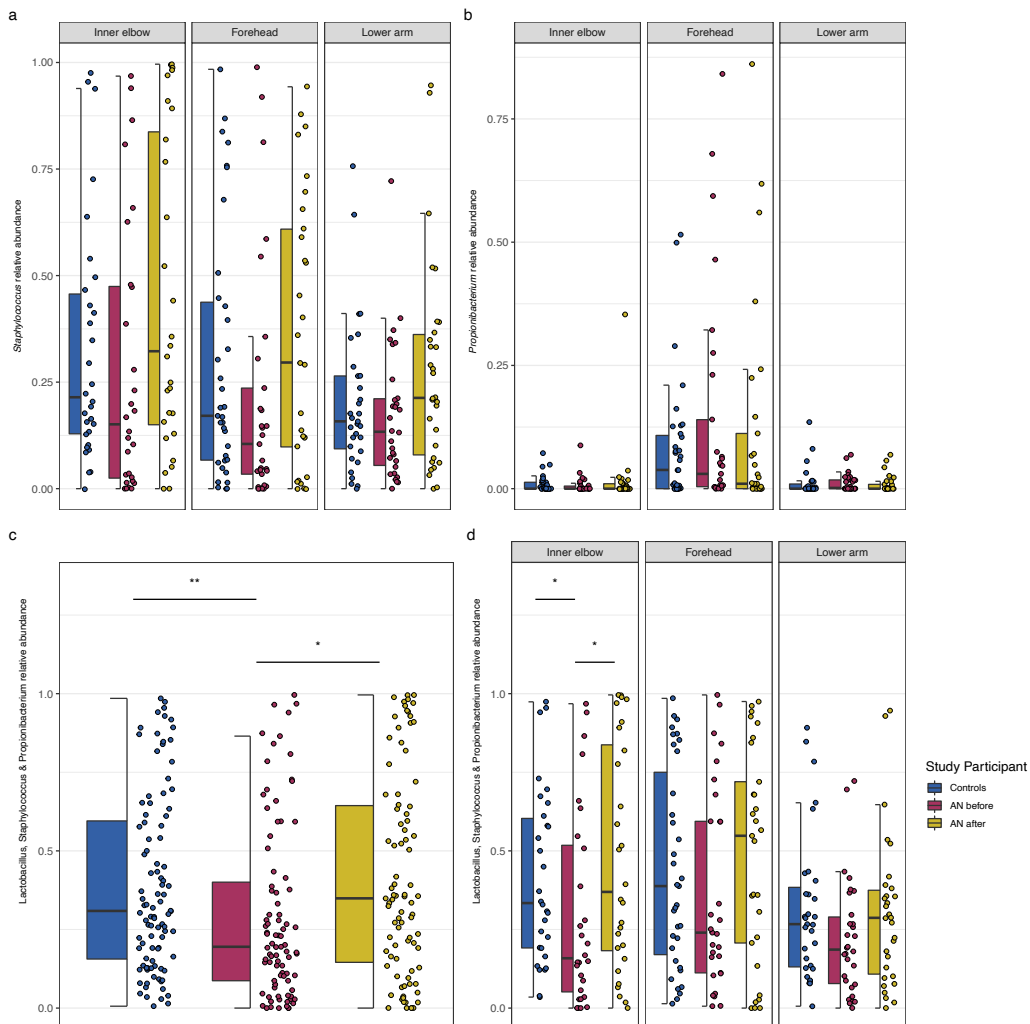

**Supplementary Fig S4.** Box plots of a. *Staphylococcus* and b. *Propionibacterium* relative abundances for healthy-weight controls and patients with AN, by weight gain arm (before and after) and, c. Sum totals of relative abundances of *Staphylococcus*, *Propionibacterium*, and *Lactobacillus* for healthy-weight controls and patients with AN, by weight gain arm

(before and after) and, **d.** faceted by sampling location. Wilcoxon test (see Methods); *p*-values: \* <0.05; \*\* < 0.01; \*\*\* < 0.001. *p*-values were adjusted for multiple testing according to Benjamini and Hochberg (1995). Line indicates the median concentration; box shows the interquartile range (IQR), and the whiskers are 1.5x IQR. Blue represents healthy-weight controls, red represents patients with AN before weight gain, and gold represents patients with AN after weight gain. Summary statistics provided in Supplementary Table S4. AN = anorexia nervosa
